# Supplementary material for: Anexelekto/MER tyrosine kinase inhibitor ONO-7475 arrests growth and kills FMS-like tyrosine kinase 3-internal tandem duplication mutant acute myeloid leukemia cells by diverse mechanisms
Source: PubMed Central journal article supplement — Haematologica. 2017 Sep 14;102(12):2048–57. doi: 10.3324/haematol.2017.168856 (PMC5709104; doi:10.3324/haematol.2017.168856), 2017-12

# Anexelekto /MER Tyrosine Kinase Inhibitor ONO-7475 effectively kills acute myeloid leukemia cells in vitro and in vivo by mechanisms that involve disruption of diverse survival and proliferation pathways

*In vitro*

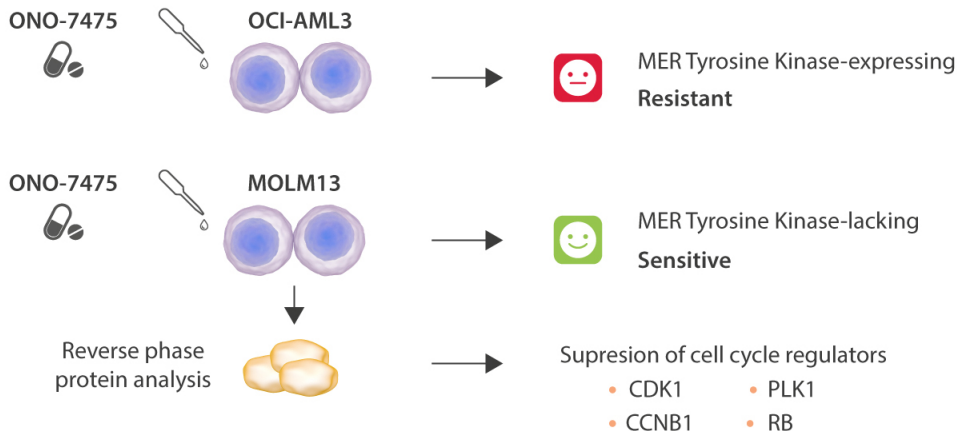

*In vivo*

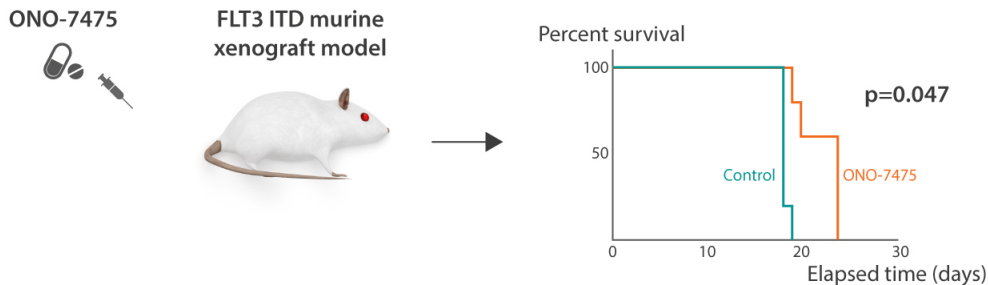

Supplement: HAEMATOL-2017-168856v3-Ruvolo-01.pdf [file HAEMATOL-2017-168856v3-Ruvolo-01.pdf]
